# Supplementary material for: A Mechanistic Approach to Elucidate the Molecular Basis of Amelioration of Perinatal Undernutrition Induced Cognitive Impairment Using Astaxanthin and DHA in the Adult Life of Albino Wistar Rats
Source: Research Square preprint supplement (doi:10.21203/rs.3.rs-3322166/v1), 2024-09-25
Supplement: Supplementary file 1 [file 595b0b93ba6064810a1044a3.docx]

**Tables**

**Table 1:** Summary of statistics showing the correlation between behavioural study parameters (%CC, RME, WME, and DI) with Synapsin-1 and PSD-95 protein expression in the hippocampal subfields.

|  | | **Synapsin-1** | | | | **PSD-95** | | | |
| --- | --- | --- | --- | --- | --- | --- | --- | --- | --- |
|  |  | CA1 | CA2 | CA3 | DG | CA1 | CA2 | CA3 | DG |
| **%CC Retention** | r- Value  p Value (2-tailed) | 0.877  0.0009 | 0.867  0.001 | 0.818  0.003 | 0.846  0.002 | 0.789  0.006 | 0.864  0.001 | 0.874  0.0009 | 0.504  0.137 |
| **Reference Memory**  **Error**  **(RME)** | r- Value  p Value (2-tailed) | -0.935  <0.0001 | -0.932  <0.0001 | -0.906  0.0003 | -0.912  0.0002 | -0.848  0.001 | -0.919  0.0002 | -0.923  0.0001 | -0.564  0.318 |
| **Working Memory**  **Error**  **(WME)** | r-Value  p Value (2-tailed) | -0.790  0.006 | -0.754  0.011 | -0.715  0.020 | -0.778  0.007 | -0.670  0.034 | -0.732  0.015 | -0.804  0.005 | -0.367  0.296 |
| **Discrimination Index (DI)** | r- Value  p Value (2-tailed) | 0.835  0.0026 | 0.884  0.0007 | 0.777  0.008 | 0.844  0.002 | 0.840  0.002 | 0.791  0.006 | 0.917  0.0002 | 0.627  0.052 |

Pearson correlation showing the relationship between synaptic protein expression in undernourished and treated animals with behavioural parameters (% CC, RME, WME, and DI) with the expression of synapsin-1 and PSD-95 in hippocampal subfields, CA1, CA2, CA3, and DG. Our study revealed a significant positive correlation between %CC retention and DI with synapsin-1 and PSD-95 expression and a significant negative correlation between RME and WME with synapsin-1 and PSD-95 (Table no. 1). On the other hand, the expression of PSD-95 in DG did not show a significant correlation with behavioural parameters (PSD-95: %CC retention: r=0.504, P=0.137; RME: r=-0.564, P=0.318; WME: r=-0.367, P=0.296; DI: r=0.627, P=0.052).
