# Supplementary material for: A Mechanistic Approach to Elucidate the Molecular Basis of Amelioration of Perinatal Undernutrition Induced Cognitive Impairment Using Astaxanthin and DHA in the Adult Life of Albino Wistar Rats
Source: Research Square preprint supplement (doi:10.21203/rs.3.rs-3322166/v1), 2024-09-25
Supplement: Supplementary file 2 [file e4c149d9199e7867cea04ee2.docx]

**Supplementary Information**

**A Mechanistic Approach to Elucidate the Molecular Basis of Amelioration of Perinatal Undernutrition Induced Cognitive Impairment Using Astaxanthin and DHA in the Adult Life of Albino Wistar Rats**

A. B.

C.

**Figure S1**: Effect of AsX and DHA supplementation to pre, post and perinatal undernutrition on brain weight. A-C) Brain weight of the offspring’s were significantly reduced in pre and perinatally undernourished groups. Maternal AsX and DHA supplementation enhanced brain weight. Results were represented as mean ± SEM. *p < 0.05, **p < 0.001, ***p < 0.0001.

A.

B.

C.

**Figure S2:** Total exploration time of training day. Total exploration time did not differ between the objects and between the experimental groups. Two-way ANOVA test was used. Values were expressed as mean ± SEM. p>0.05
